# Supplementary material for: The multifunctional design of metal–organic framework by applying linker desymmetrization strategy: synergistic catalysis for high CO2-epoxide conversion
Source: Royal Society of Chemistry journal article supplement (doi:10.1039/d1qi00960e), 2021-01-01
Supplement: d1qi00960e1.pdf [file d1qi00960e1.pdf]

## Electronic Supplementary Information (ESI)

### The multifunctional design of metal-organic framework by applying linker desymmetrization strategy: synergistic catalysis for high CO<sub>2</sub>-epoxides conversion

Yueying Zhu, Jiaming Gu, Xueyue Yu, Borong Zhang, Guanghua Li, Jiantang Li,\* and Yunling Liu\*

*State Key Laboratory of Inorganic Synthesis and Preparative Chemistry, College of Chemistry, Jilin University, Changchun 130012, P. R. China. Fax: +86-431-85168624; Tel: +86-431-85168614; E-mail: yunling@jlu.edu.cn, lij1992@163.com.*

#### Table of Contents

|                                                                                                                                             |     |
|---------------------------------------------------------------------------------------------------------------------------------------------|-----|
| <b>S1. Calculation procedures of selectivity from IAST</b>                                                                                  | S3  |
| <b>S2. Details of experiments and calculation procedures of catalytic efficiency</b>                                                        | S3  |
| <b>S3. Supporting Figures</b>                                                                                                               | S4  |
| Fig. S1 Simulated and as-synthesized PXRD patterns of compound <b>1</b> .                                                                   | S4  |
| Fig. S2 Simulated and as-synthesized PXRD patterns of UTSA-20.                                                                              | S4  |
| Fig. S3 Topology simplification of compound <b>1</b> .                                                                                      | S5  |
| Fig. S4 Topological features of compound <b>1</b> displayed by tiles and face symbols.                                                      | S5  |
| Fig. S5 Diversities of CPTPTA <sup>5-</sup> ligand in compound <b>1</b> and BHB ligand in UTSA-20.                                          | S5  |
| Fig. S6 Comparisons between UTSA-20 and compound <b>1</b> .                                                                                 | S6  |
| Fig. S7 Solvent stability test of compound <b>1</b> .                                                                                       | S7  |
| Fig. S8 Thermogravimetric analyses of compound <b>1</b> and CH <sub>3</sub> OH exchanged samples.                                           | S7  |
| Fig. S9 N <sub>2</sub> adsorption isotherm of compound <b>1</b> under 77 K and pore size distribution of compound <b>1</b> .                | S8  |
| Fig. S10 N <sub>2</sub> adsorption isotherm of UTSA-20 under 77 K.                                                                          | S8  |
| Fig. S11-S16 Gas adsorption isotherms of compound <b>1</b> and calculating Q <sub>st</sub> .                                                | S9  |
| Fig. S17 Gas adsorption isotherms with DSLF fits and IAST selectivity for compound <b>1</b> .                                               | S11 |
| Fig. S18 Simulated CPK models of epoxides in channels for compound <b>1</b> .                                                               | S12 |
| Fig. S19 <sup>1</sup> H NMR spectrum of PO cycloaddition reaction catalyzed by compound <b>1</b> .                                          | S12 |
| Fig. S20 Kinetic curves of CO <sub>2</sub> -PO cycloaddition.                                                                               | S13 |
| Fig. S21 Recycling experiments of CO <sub>2</sub> -PO cycloaddition reaction and PXRD patterns of compound <b>1</b> after 5 times recycled. | S13 |
| Fig. S22 FT-IR spectra of fresh compound <b>1</b> and compound <b>1</b> after catalysis.                                                    | S14 |
| Fig. S23 <sup>1</sup> H NMR spectrum of compound <b>1</b> after 5 times recycle.                                                            | S14 |
| Fig. S24 N <sub>2</sub> adsorption isotherm at 77 K of activated samples and compound <b>1</b> after 5 times recycle.                       | S15 |
| Fig. S25-27 <sup>1</sup> H NMR spectrum of the mixture catalyzed by compound <b>1</b> .                                                     | S15 |
| Fig. S28 FT-IR spectra of <i>cis</i> -cyclic cyclohexyl carbonate.                                                                          | S17 |

|                                                                                                    |     |
|----------------------------------------------------------------------------------------------------|-----|
| <b>S4. Supporting Tables</b>                                                                       | S18 |
| Table S1. Crystal data and structure refinements for compound <b>1</b> .                           | S18 |
| Table S2. Selected bond lengths [ $\text{\AA}$ ] and angles [ $^\circ$ ] for compound <b>1</b> .   | S19 |
| Table S3. Comparisons about $\text{CO}_2$ uptakes of some selected MOFs.                           | S20 |
| Table S4. Comparisons about $\text{CO}_2$ -PO cycloaddition reactions of some selected MOFs.       | S21 |
| Table S5. Crystal data comparisons of compound <b>1</b> and UTSA-20.                               | S22 |
| Table S6. Comparisons about $\text{CO}_2$ cycloaddition reaction of compound <b>1</b> and UTSA-20. | S22 |
| Table S7. ICP-OES analysis of $\text{Cu}^{2+}$ in the 5 <sup>th</sup> time reaction.               | S22 |
| Table S8. Sizes of epoxides selected for the experiments.                                          | S22 |
| <b>References</b>                                                                                  | S23 |

## S1. Calculation procedures of selectivity from IAST

The measured experimental data is excess loadings ( $q^{ex}$ ) of the pure components CO<sub>2</sub>, CH<sub>4</sub>, C<sub>2</sub>H<sub>2</sub>, C<sub>2</sub>H<sub>4</sub>, C<sub>2</sub>H<sub>6</sub> and C<sub>3</sub>H<sub>8</sub> for compound **1**, which should be converted to absolute loadings ( $q$ ) firstly.

$$q = q^{ex} + \frac{pV_{pore}}{ZRT} \quad (1)$$

Here  $Z$  is the compressibility factor. The Peng-Robinson equation (Eq. 1) is used to estimate the value of compressibility factor to obtain the absolute loading, while the measure pore volume is also necessary.

The dual-site Langmuir-Freundlich equation (Eq. 2) is used for fitting the isotherm data at 298 K.

$$q = q_{m1} \times \frac{b_1 \times p^{1/n_1}}{1 + b_1 \times p^{1/n_1}} + q_{m2} \times \frac{b_2 \times p^{1/n_2}}{1 + b_2 \times p^{1/n_2}} \quad (2)$$

Here  $p$  is the pressure of the bulk gas at equilibrium with the adsorbed phase (kPa),  $q$  is the adsorbed amount per mass of adsorbent (mol kg<sup>-1</sup>),  $q_{m1}$  and  $q_{m2}$  are the saturation capacities of sites 1 and 2 (mol kg<sup>-1</sup>),  $b_1$  and  $b_2$  are the affinity coefficients of sites 1 and 2 (1/kPa),  $n_1$  and  $n_2$  are the deviations from an ideal homogeneous surface.

$$S = \frac{q_1/q_2}{p_1/p_2} \quad (3)$$

The selectivity of preferential adsorption of component 1 over component 2 in a mixture containing 1 and 2, perhaps in the presence of other components too, can be formally defined as  $q_1$  and  $q_2$  are the absolute component loadings of the adsorbed phase in the mixture. These component loadings are also termed the uptake capacities. We calculate the values of  $q_1$  and  $q_2$  using the Ideal Adsorbed Solution Theory (IAST) of Myers and Prausnitz (Eq. 3).

## S2. Details of experiments and calculation procedures of catalytic efficiency

In the high-pressure catalytic reaction, epoxide (20 mmol), TBAB (1 mmol, 5 mol %), activated compound **1** (0.5 mol % open Cu sites) were put into a high-pressure reactor. To activate the MOFs materials, the as-synthesized samples were activated with the exchange of methanol solvent 8 times in 1 day at 85 °C oven. After that, the samples were dried in the vacuum condition for 10 h at 85 °C and collected the MOFs for further cycloaddition reaction.

Before triggering the reaction, pump out the air inside the reactor and fill in with pure CO<sub>2</sub>. After 3 times pump-fill procedure, turn the temperature and pressure to specific conditions (2 MPa, 60 °C, 6 h). The speed of stirring was 400 rpm. After centrifuging to recycle the catalyst, a little supernatant reaction mixture was taken to analyze by <sup>1</sup>H NMR.

The yields of PO, **1**, 2-epoxy-3-phenoxypropane, glycidyl-2-methylphenyl ether and cyclohexene oxide (H<sub>a</sub> for epoxides and H<sub>a'</sub> for carbonates, respectively) catalyzed by compound **1** were calculated according to the following equation (Eq. 4).

$$Yield(\%) = \frac{I_{H_a}}{I_{H_a} + I_{H_a'}} \times 100\% \quad (4)$$

The yield of SO to styrene carbonate were determined by calculation of the <sup>1</sup>H NMR integrals of corresponding highlighted protons in styrene oxide (H<sub>a</sub>), styrene carbonate (H<sub>a'</sub>) and phenyl group (H<sub>b</sub>-H<sub>f</sub>)

(from SO, styrene carbonate and other by-products) according to the following equation (Eq. 5).

$$Yield(\%) = \frac{5 \times I_{H_a'}}{I_{H_b} - H_f} \times 100\% \quad (5)$$

### S3. Supporting Figures

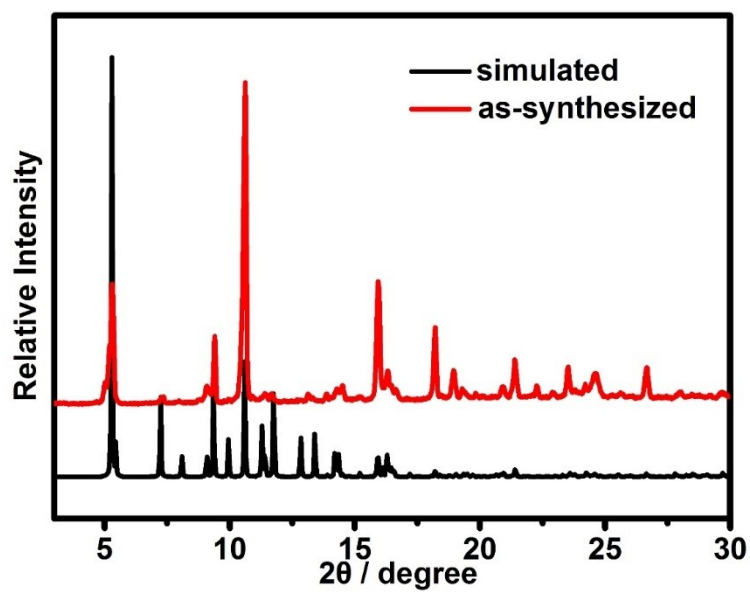

Fig. S1 Simulated and as-synthesized PXRd patterns of compound 1.

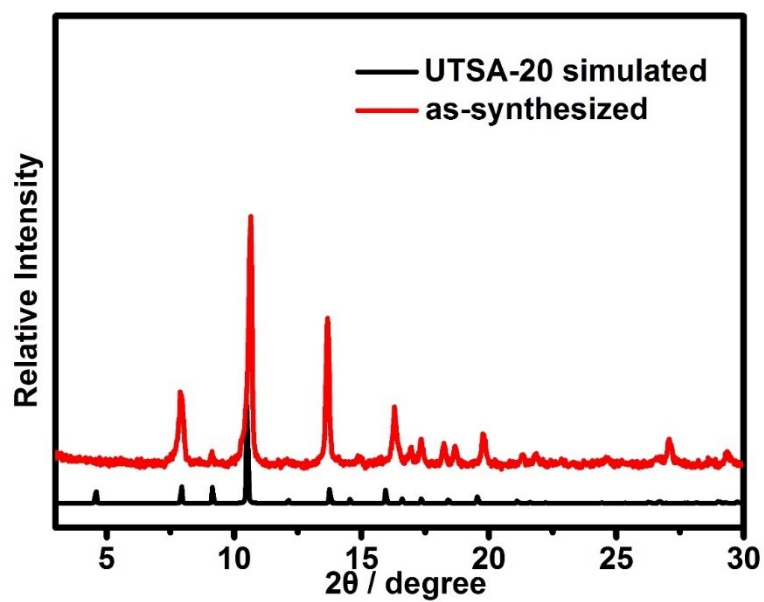

Fig. S2 Simulated and as-synthesized PXRd patterns of UTSA-20.<sup>1</sup>

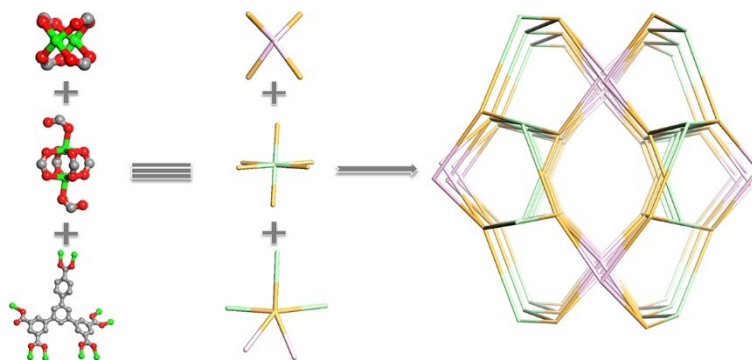

**Fig. S3** Topology simplification of organic and inorganic SBUs as well as (4, 5, 6)-connected topology.

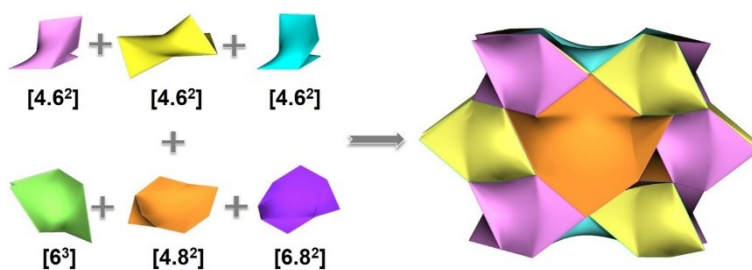

**Fig. S4** Topological features of compound **1** displayed by tiles and face symbols.

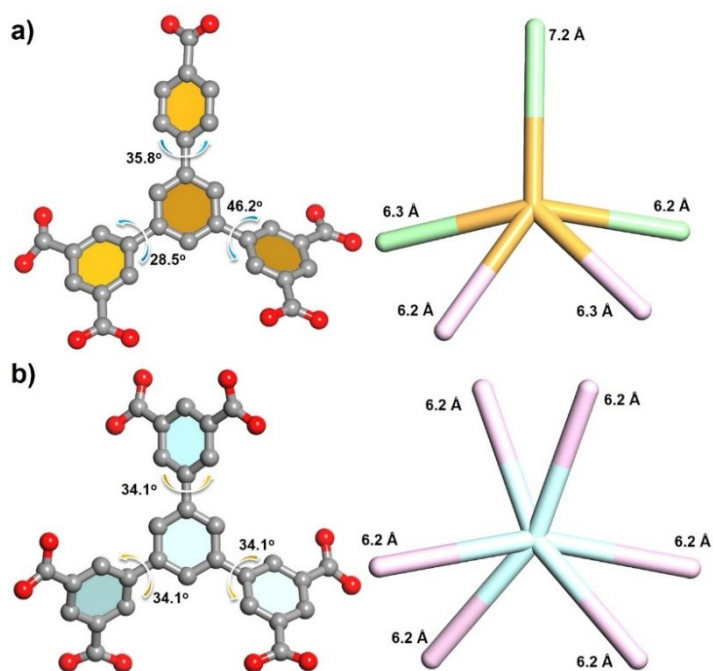

**Fig. S5** a) Different torsion angles and diverse distances of CPTPTA<sup>5-</sup> ligand in compound **1**; b) torsion angles and distances of BHB ligand in UTSA-20.

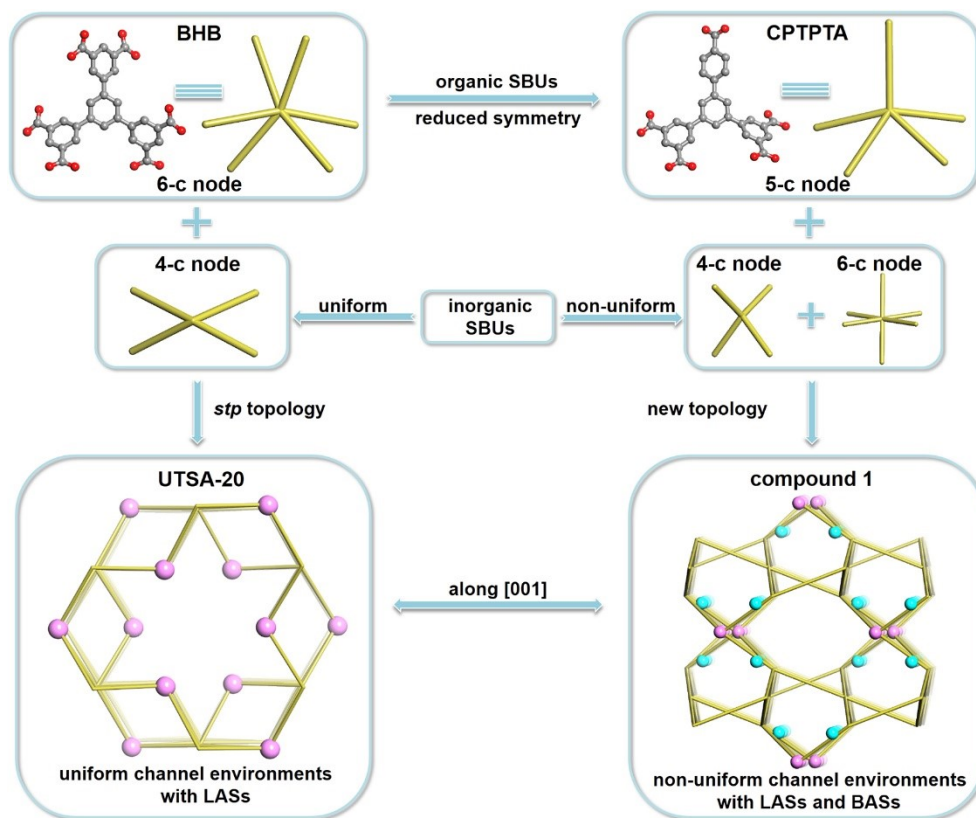

**Fig. S6** Structure, topology, and catalysis site comparisons between UTSA-20 (left) and compound 1 (right).

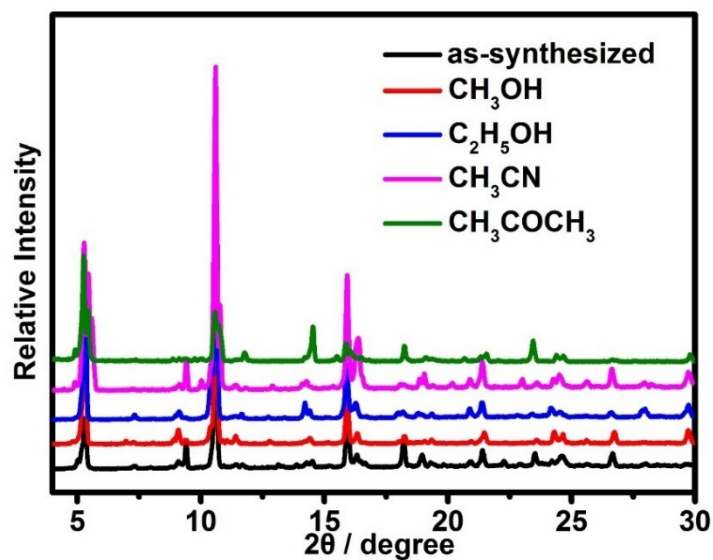

**Fig. S7** PXRD patterns of compound 1 soaking in different common organic solvents.

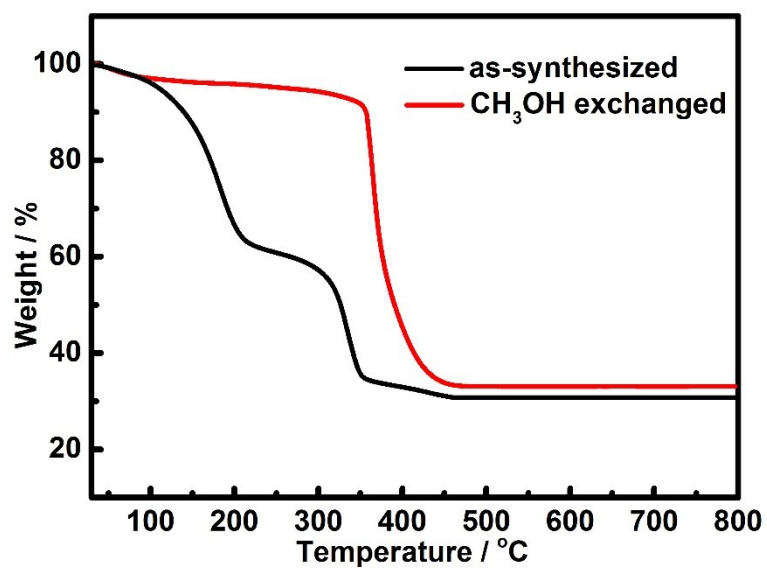

**Fig. S8** Thermogravimetric analysis curves of compound **1** for the as-synthesized samples and CH<sub>3</sub>OH exchanged samples.



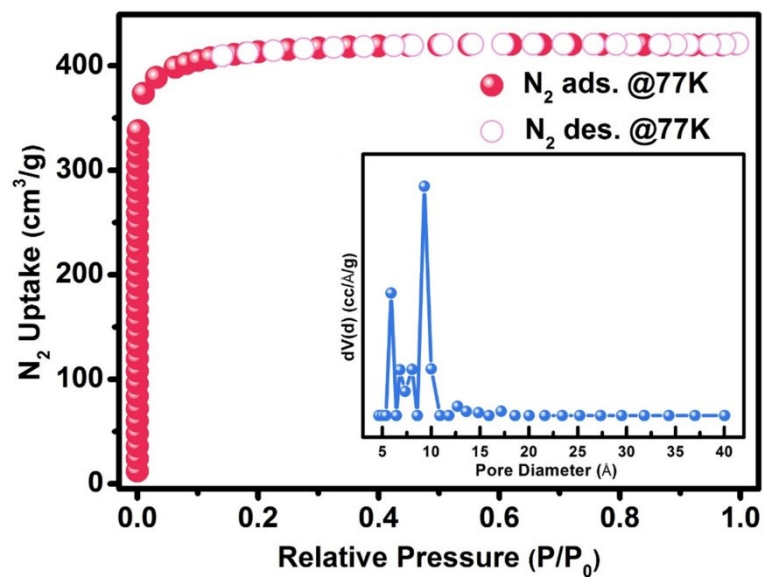

Fig. S9 N<sub>2</sub> adsorption isotherm of compound **1** under 77 K; (inset) pore size distribution of compound **1**.

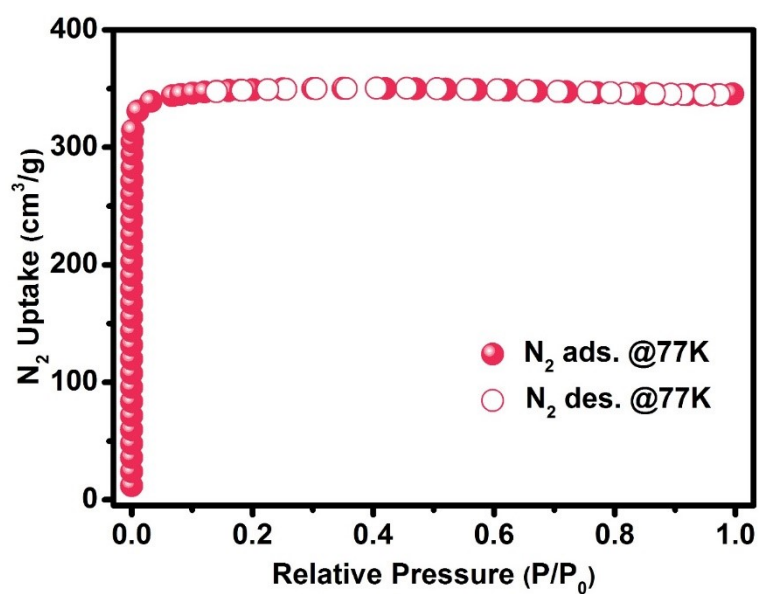

Fig. S10 N<sub>2</sub> adsorption isotherm of UTSA-20 under 77 K.

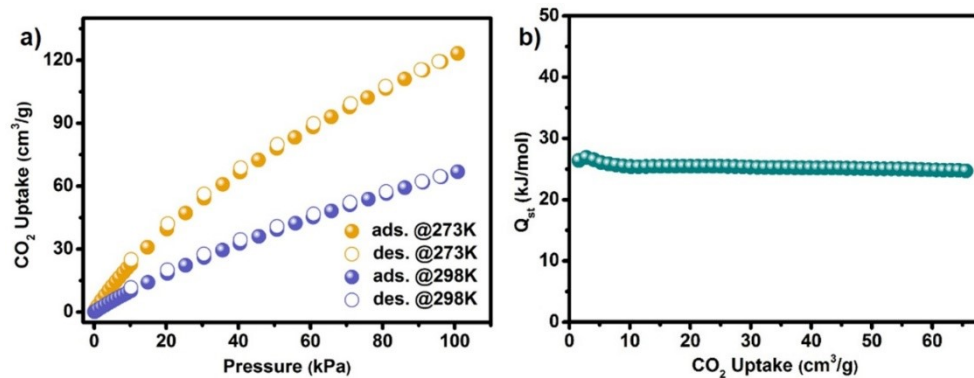

**Fig. S11** (a) CO<sub>2</sub> adsorption isotherms of compound **1** at 273 K and 298 K; (b)  $Q_{st}$  of CO<sub>2</sub> for compound **1**.

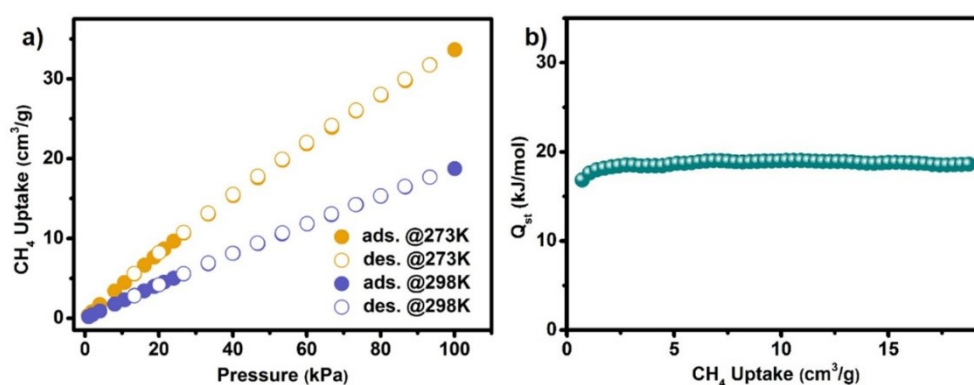

**Fig. S12** (a) CH<sub>4</sub> adsorption isotherms of compound **1** at 273 K and 298 K; (b)  $Q_{st}$  of CH<sub>4</sub> for compound **1**.

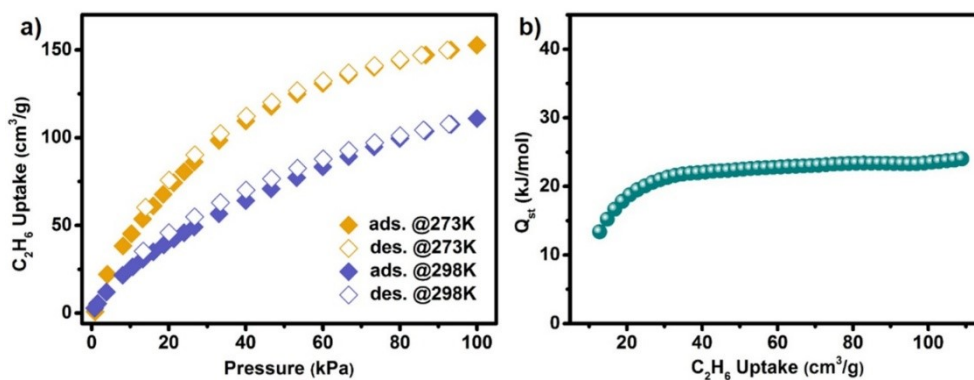

**Fig. S13** (a) C<sub>2</sub>H<sub>6</sub> adsorption isotherms of compound **1** at 273 K and 298 K; (b)  $Q_{st}$  of C<sub>2</sub>H<sub>6</sub> for compound **1**.

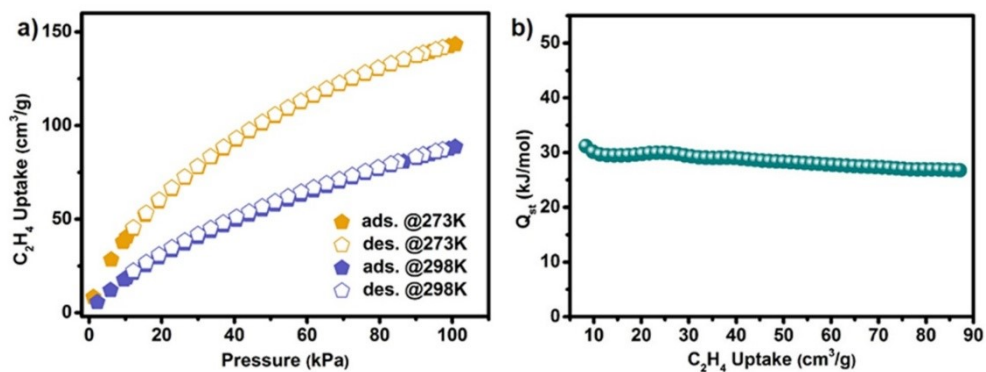

Fig. S14 (a) C<sub>2</sub>H<sub>4</sub> adsorption isotherms of compound 1 at 273 K and 298 K; (b) Q<sub>st</sub> of C<sub>2</sub>H<sub>4</sub> for compound 1.

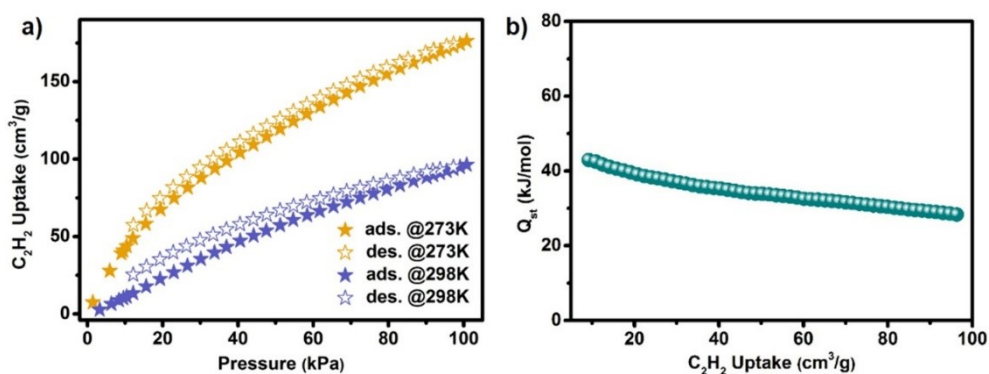

Fig. S15 (a) C<sub>2</sub>H<sub>2</sub> adsorption isotherms of compound 1 at 273 K and 298 K; (b) Q<sub>st</sub> of C<sub>2</sub>H<sub>2</sub> for compound 1.

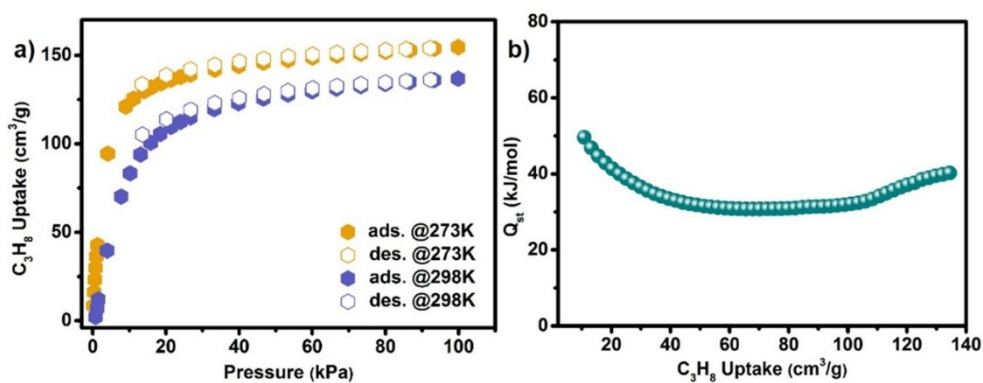

Fig. S16 (a) C<sub>3</sub>H<sub>8</sub> adsorption isotherms of compound 1 at 273 K and 298 K; (b) Q<sub>st</sub> of C<sub>3</sub>H<sub>8</sub> for compound 1.

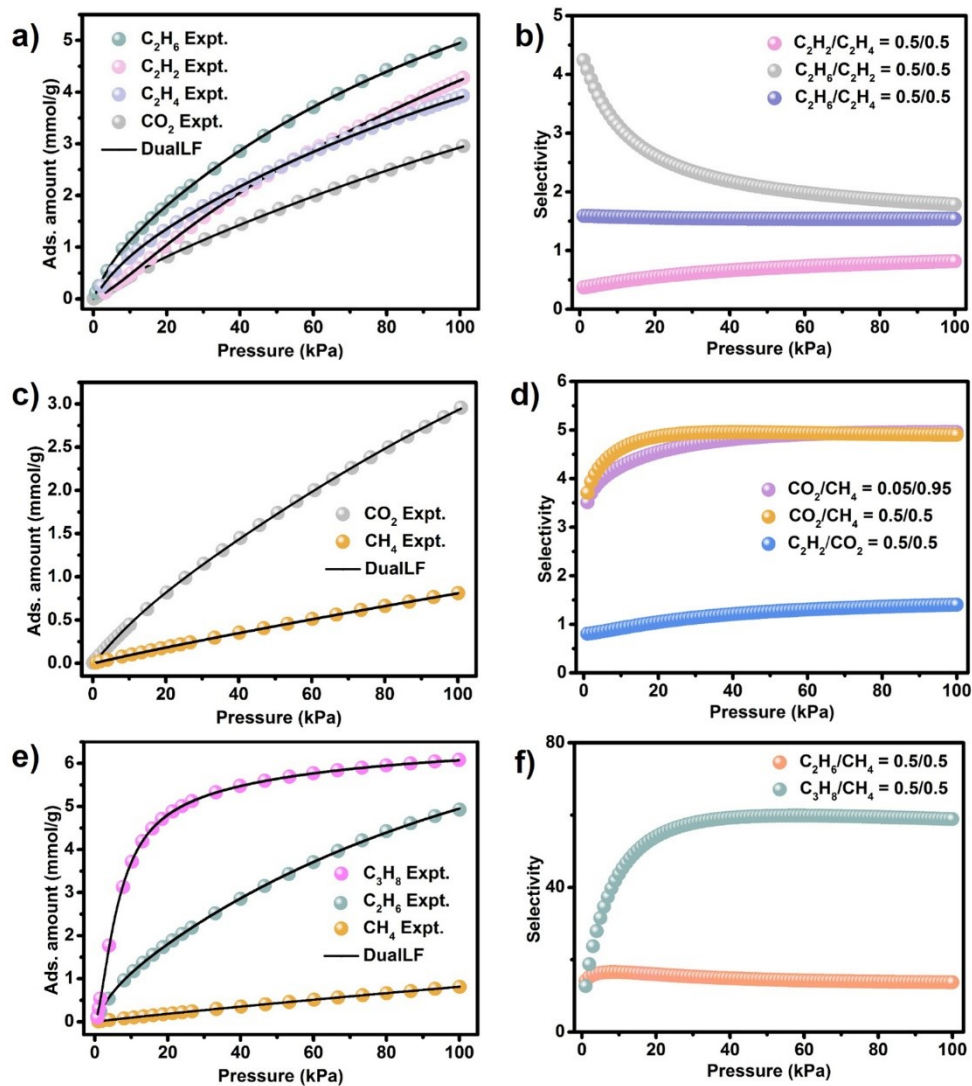

**Fig. S17** Gas adsorption isotherms at 298 K along with the dual-site Langmuir Freundlich (DSLFF) fits (a, c and e) and adsorption selectivity predicted by the Ideal Adsorbed Solution Theory (IAST) at 298 K, 1 atm for compound **1** (b, d and f).

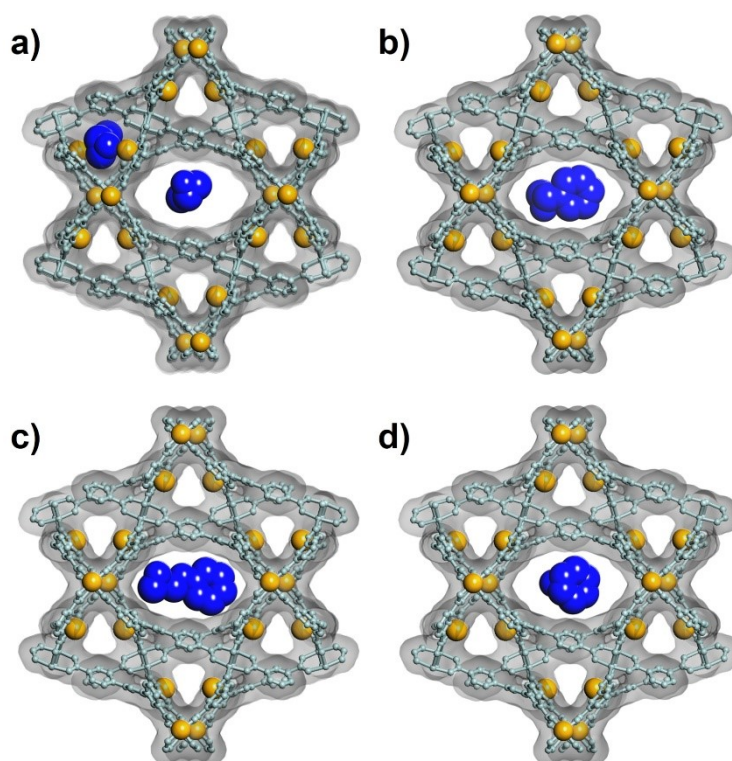

**Fig. S18** Simulated CPK models of epoxides in channels for compound **1** (color scheme: active sites = yellow, structure of compound **1** = light blue, epoxides = dark blue).

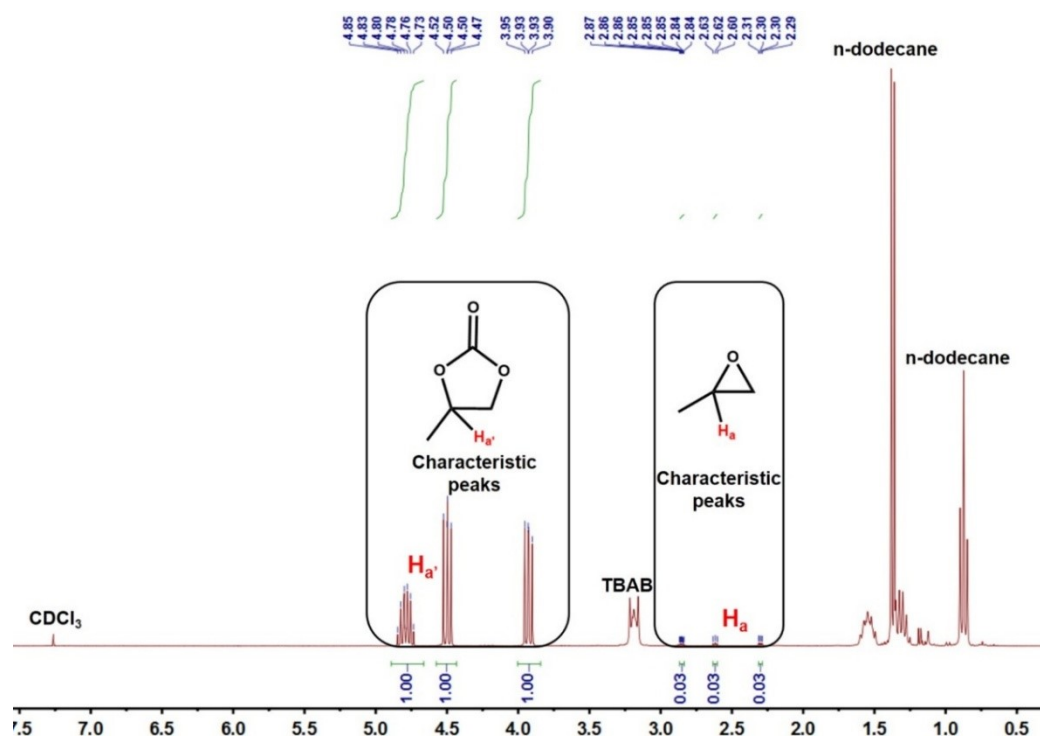

**Fig. S19**  $^1\text{H}$  NMR spectrum of the mixture produced by cycloaddition reaction of propylene oxide catalyzed by compound **1** in  $\text{CDCl}_3$ . n-dodecane was used as internal standard.

Sixteen parallel experiments for 20 min, 40 min, 1 h, 2 h, 3 h, 4 h, 5 h and 6 h of run 1 and run 5 with the optimized conditions (0.5 mol % Cu sites along with 0.5 mol % protonated carboxylic acid sites and 5 mol % TBAB under 60 °C at 2 MPa for 6 h) were executed to investigate the influence of reaction time on PC's yield. As shown in Fig. S20 (ESI<sup>†</sup>), before 40 min the curves raised rapidly, which showed that the reaction was within the kinetic interval. From 40 min to 6 h, the decline of the curve slope displayed that the inflexion existed in the interval. In run 5, the yield reduced, which may cause by the declension of compound 1's crystallization.

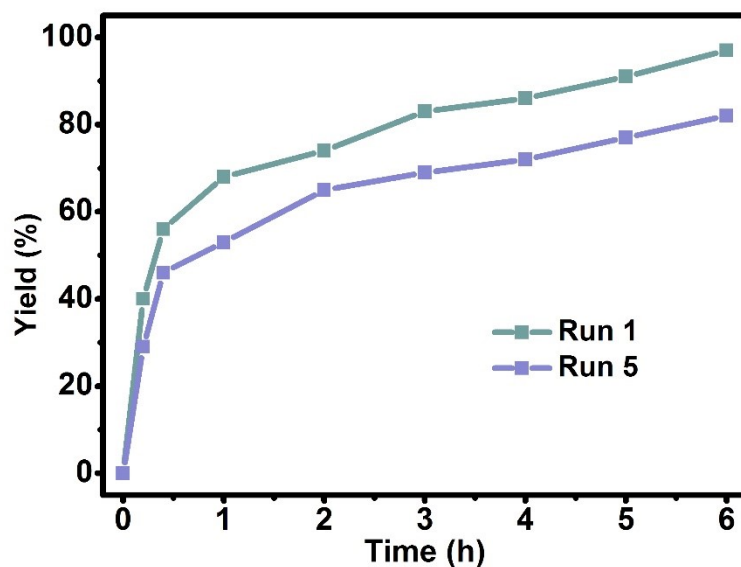

Fig. S20 Kinetic curves of CO<sub>2</sub>-PO cycloaddition catalyzed by compound 1 (color scheme: green = run 1; purple = run 5).

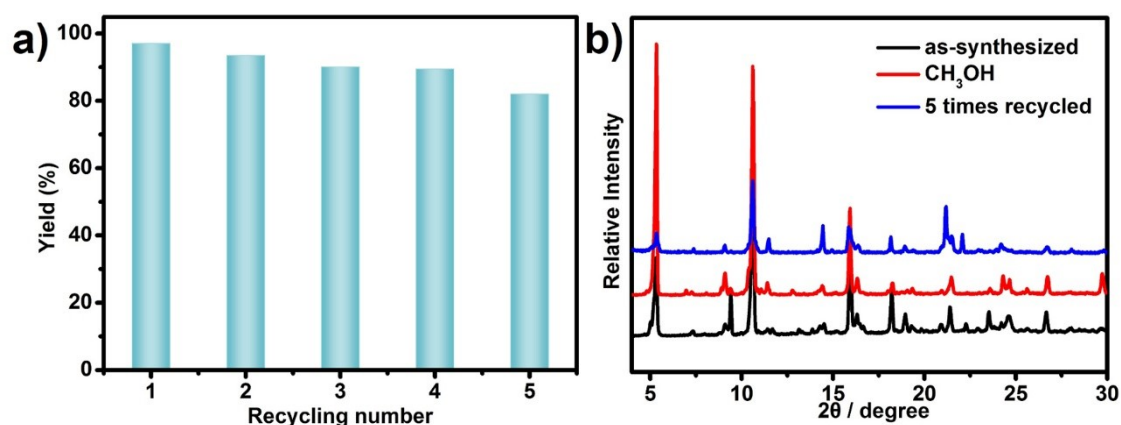

Fig. S21 (a) Recycling experiments of the cycloaddition reaction of PO with CO<sub>2</sub> with compound 1; (b) PXRD patterns of compound 1 after 5 times recycled.



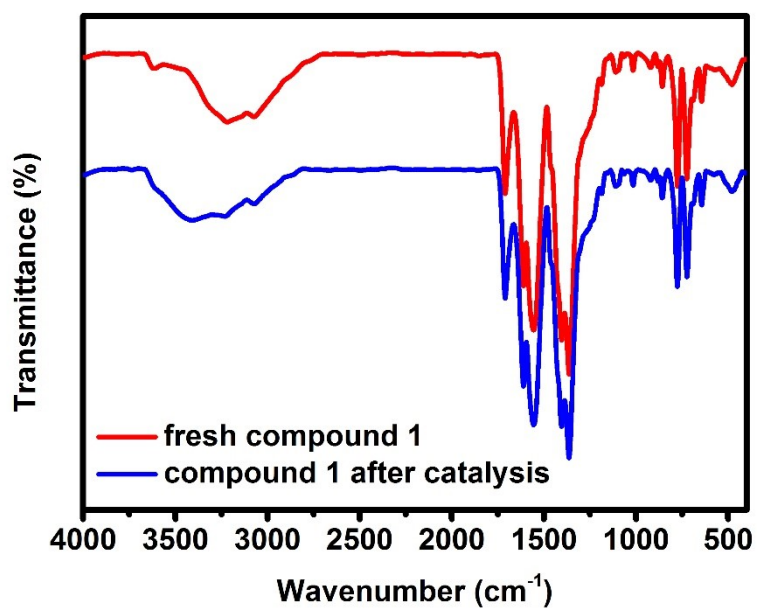

Fig. S22 FT-IR spectra of fresh compound **1** and compound **1** after catalysis.

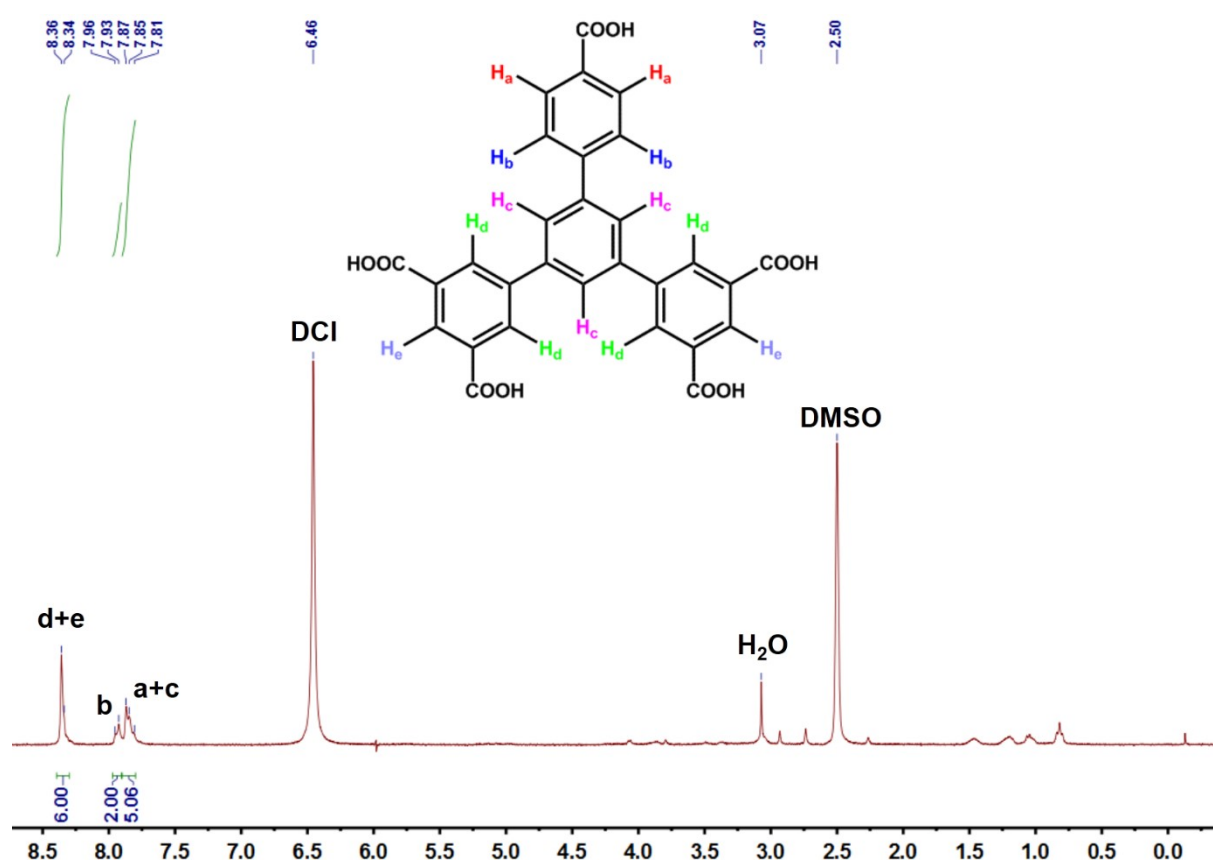

Fig. S23  $^1\text{H}$  NMR spectrum of compound **1** after 5 times recycle in DCl and DMSO.

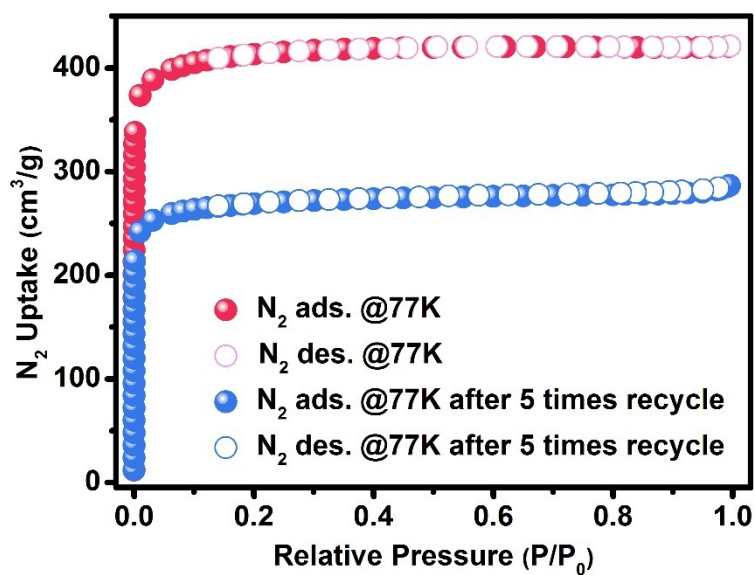

Fig. S24  $N_2$  adsorption isotherm at 77 K of activated compound **1** (red) and compound **1** after 5 times recycle (blue).

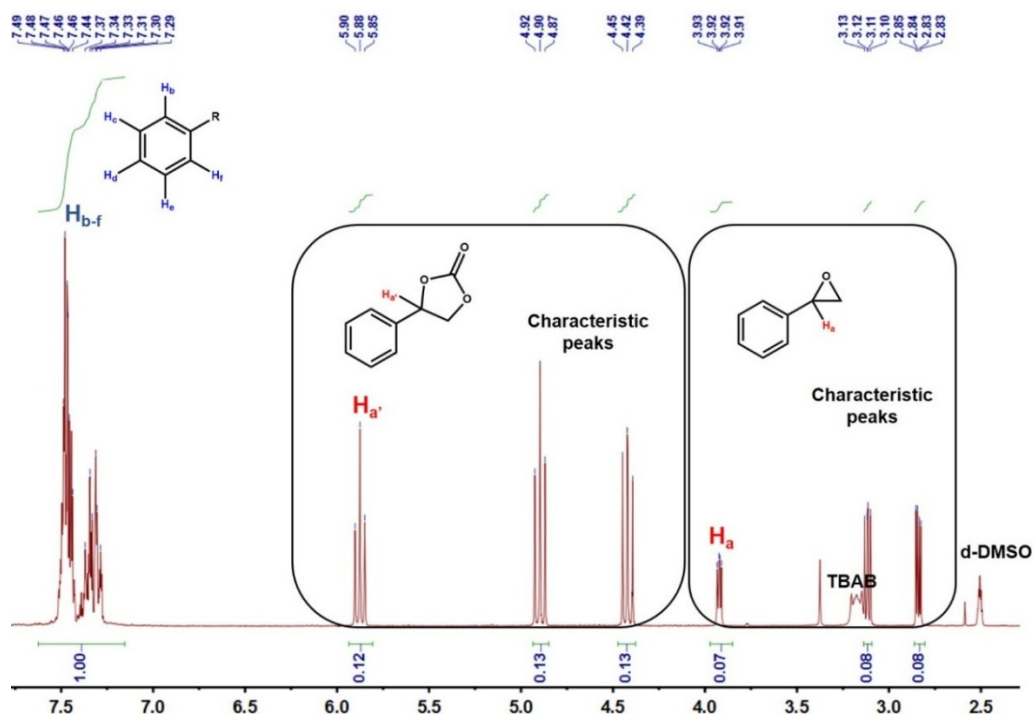

Fig. S25  $^1H$  NMR spectrum of the mixture produced by cycloaddition reaction of styrene oxide catalyzed by compound **1** in  $d$ -DMSO.



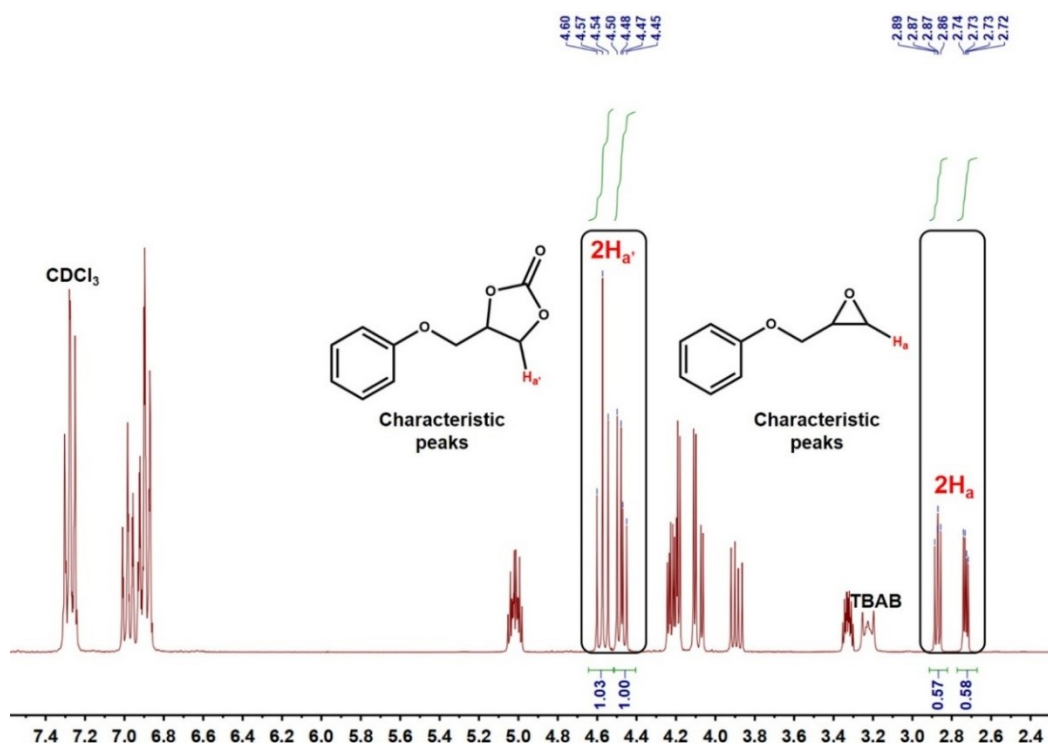

**Fig. S26** <sup>1</sup>H NMR spectrum of the mixture produced by cycloaddition reaction of 1,2-epoxy-3-phenoxypropane catalyzed by compound **1** in CDCl<sub>3</sub>.

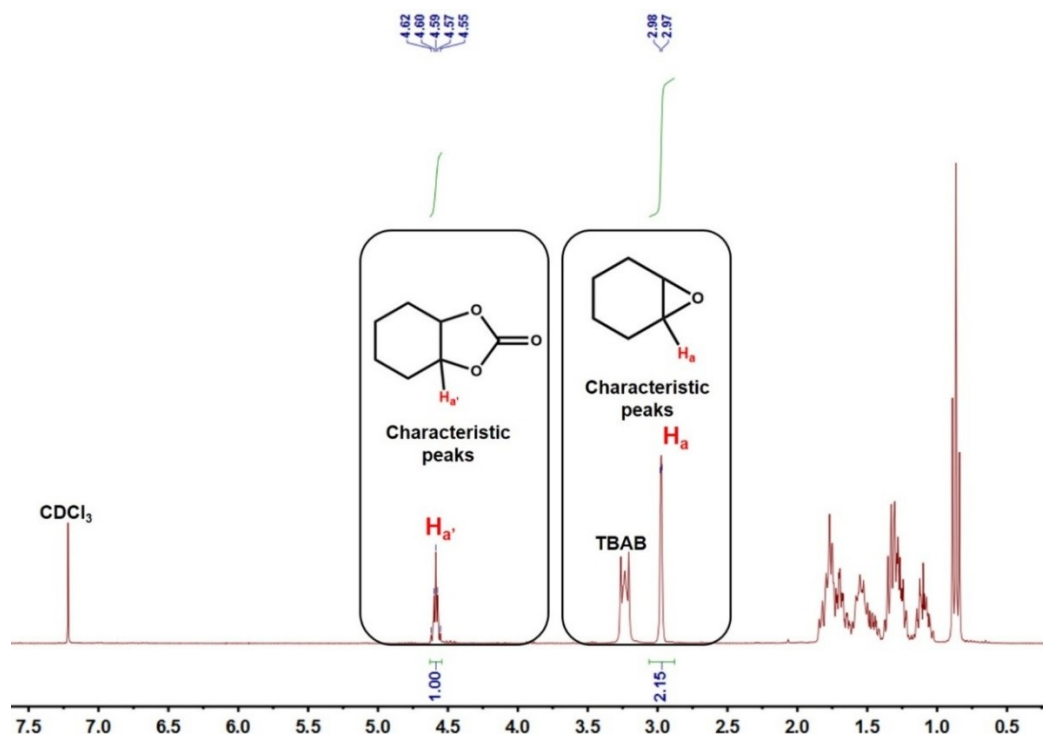

**Fig. S27** <sup>1</sup>H NMR spectrum of the mixture produced by cycloaddition reaction of cyclohexene oxide catalyzed by compound **1** in CDCl<sub>3</sub>.

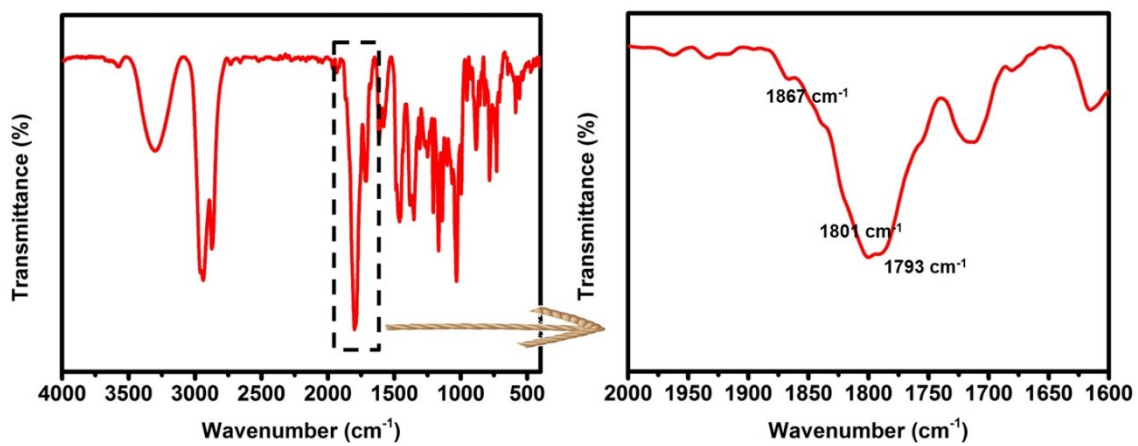

Fig. S28 FT-IR spectra of *cis*-cyclic cyclohexyl carbonate.

## S4. Supporting Tables

**Table S1.** Crystal data and structure refinements for compound 1.

| compound                                                                    | Compound 1                                                                     |
|-----------------------------------------------------------------------------|--------------------------------------------------------------------------------|
| Formula                                                                     | C <sub>44</sub> H <sub>64</sub> Cu <sub>2</sub> N <sub>8</sub> O <sub>22</sub> |
| Formula weight                                                              | 1184.11                                                                        |
| Temperature (K)                                                             | 293(2)                                                                         |
| Wavelength (Å)                                                              | 0.71073                                                                        |
| Crystal system                                                              | Monoclinic                                                                     |
| Space group                                                                 | C2/c                                                                           |
| <i>a</i> (Å)                                                                | 33.183(7)                                                                      |
| <i>b</i> (Å)                                                                | 19.468(4)                                                                      |
| <i>c</i> (Å)                                                                | 16.287(3)                                                                      |
| $\alpha$ (°)                                                                | 90                                                                             |
| $\beta$ (°)                                                                 | 102.34(3)                                                                      |
| $\gamma$ (°)                                                                | 90                                                                             |
| <i>V</i> (Å <sup>3</sup> )                                                  | 10279(4)                                                                       |
| <i>Z</i> , <i>D<sub>c</sub></i> (Mg/m <sup>3</sup> )                        | 8, 1.530                                                                       |
| <i>F</i> (000)                                                              | 4944                                                                           |
| $\vartheta$ range (deg)                                                     | 2.292-25.379                                                                   |
| reflns collected/unique                                                     | 40505/9423                                                                     |
| <i>R<sub>int</sub></i>                                                      | 0.0321                                                                         |
| data/restraints/params                                                      | 9423/15/388                                                                    |
| GOF on <i>F</i> <sup>2</sup>                                                | 1.086                                                                          |
| <i>R</i> <sub>1</sub> , <i>wR</i> <sub>2</sub> ( <i>I</i> > 2σ( <i>I</i> )) | 0.0353, 0.1100                                                                 |
| <i>R</i> <sub>1</sub> , <i>wR</i> <sub>2</sub> (all data)                   | 0.0407, 0.1124                                                                 |

$${}^a R_1 = \sum ||F_o| - |F_c|| / \sum |F_o|, {}^b wR_2 = [\sum w(|F_o|^2 - |F_c|^2) / \sum w(F_o^2)]^{1/2}$$

**Table S2.** Selected bond lengths [Å] and angles [°] for compound 1.

| Compound 1           |            |                      |            |
|----------------------|------------|----------------------|------------|
| Cu(1)-O(6)#1         | 1.9634(19) | O(7)#5-Cu(2)-O(3)    | 173.33(8)  |
| Cu(1)-O(2)#2         | 1.9655(19) | O(7)#5-Cu(2)-O(8)#6  | 88.14(9)   |
| Cu(1)-O(1)           | 1.977(2)   | O(3)-Cu(2)-O(8)#6    | 88.06(9)   |
| Cu(1)-O(5)#3         | 1.981(2)   | O(7)#5-Cu(2)-O(4)#7  | 89.65(8)   |
| Cu(1)-O(9)#4         | 2.1256(19) | O(3)-Cu(2)-O(4)#7    | 92.29(8)   |
| Cu(1)-Cu(1)#2        | 2.7161(8)  | O(8)#6-Cu(2)-O(4)#7  | 162.01(7)  |
| Cu(2)-O(7)#5         | 1.9254(18) | O(7)#5-Cu(2)-O(11)   | 93.92(10)  |
| Cu(2)-O(3)           | 1.9348(17) | O(3)-Cu(2)-O(11)     | 92.23(10)  |
| Cu(2)-O(8)#6         | 2.0134(18) | O(8)#6-Cu(2)-O(11)   | 102.24(10) |
| Cu(2)-O(4)#7         | 2.0155(17) | O(4)#7-Cu(2)-O(11)   | 95.72(9)   |
| Cu(2)-O(11)          | 2.137(2)   | O(7)#5-Cu(2)-Cu(2)#7 | 86.12(6)   |
| Cu(2)-Cu(2)#7        | 2.6227(8)  | O(3)-Cu(2)-Cu(2)#7   | 87.91(6)   |
| O(6)#1-Cu(1)-O(2)#2  | 90.23(9)   | O(8)#6-Cu(2)-Cu(2)#7 | 81.68(6)   |
| O(6)#1-Cu(1)-O(1)    | 88.42(10)  | O(4)#7-Cu(2)-Cu(2)#7 | 80.35(6)   |
| O(2)#2-Cu(1)-O(1)    | 165.72(8)  | O(11)-Cu(2)-Cu(2)#7  | 176.08(8)  |
| O(6)#1-Cu(1)-O(5)#3  | 165.94(8)  | C(13)-O(1)-Cu(1)     | 126.83(18) |
| O(2)#2-Cu(1)-O(5)#3  | 87.28(9)   | C(13)-O(2)-Cu(1)#2   | 122.13(18) |
| O(1)-Cu(1)-O(5)#3    | 90.59(10)  | C(20)-O(3)-Cu(2)     | 119.08(16) |
| O(6)#1-Cu(1)-O(9)#4  | 103.26(8)  | C(20)-O(4)-Cu(2)#7   | 124.85(16) |
| O(2)#2-Cu(1)-O(9)#4  | 102.19(9)  | C(21)-O(5)-Cu(1)#8   | 123.77(17) |
| O(1)-Cu(1)-O(9)#4    | 91.95(9)   | C(21)-O(6)-Cu(1)#4   | 124.39(16) |
| O(5)#3-Cu(1)-O(9)#4  | 90.80(8)   | C(28)-O(7)-Cu(2)#5   | 121.91(17) |
| O(6)#1-Cu(1)-Cu(1)#2 | 83.11(6)   | C(28)-O(8)-Cu(2)#9   | 122.69(16) |
| O(2)#2-Cu(1)-Cu(1)#2 | 85.15(6)   | C(29)-O(9)-Cu(1)#1   | 125.4(2)   |
| O(1)-Cu(1)-Cu(1)#2   | 80.58(6)   | Cu(2)-O(11)-H(11A)   | 115(2)     |
| O(5)#3-Cu(1)-Cu(1)#2 | 82.89(6)   | Cu(2)-O(11)-H(11B)   | 111(2)     |
| O(9)#4-Cu(1)-Cu(1)#2 | 170.13(6)  |                      |            |

Symmetry transformations used to generate equivalent atoms:

#1  $-x+1/2, -y+1, z-1/2$  #2  $x-1/2, y, -z+3/2$  #3  $x, -y+3/2, z$  #4  $x+1/2, y, -z+1/2$

#5  $x+1/2, -y+3/2, -z+1/2$  #6  $x+1/2, y, -z+3/2$  #7  $-x+1/2, -y+1, z+1/2$  #8  $x-1/2, y, -z+1/2$

**Table S3.** Comparisons about CO<sub>2</sub> uptakes under 1 atm at 273 K and 298 K of some selected MOFs.

| Compounds                | BET (m <sup>2</sup> g <sup>-1</sup> ) | 273 K CO <sub>2</sub> uptake (mmol g <sup>-1</sup> ) | 298 K CO <sub>2</sub> uptake (mmol g <sup>-1</sup> ) | Ref.             |
|--------------------------|---------------------------------------|------------------------------------------------------|------------------------------------------------------|------------------|
| Mg <sub>2</sub> (dobpdc) | 3270                                  | N.A.                                                 | 6.4                                                  | 2                |
| UTSA-20                  | 1156                                  | N.A.                                                 | 5.2 (300 K)                                          | 1                |
| MAF-66                   | 1014                                  | 6.3                                                  | 4.4                                                  | 3                |
| HKUST-1                  | 1507                                  | N.A.                                                 | 4.1                                                  | 4                |
| <b>Compound 1</b>        | 1355                                  | 5.5                                                  | 3.0                                                  | <b>This work</b> |
| IFMC                     | 780                                   | 4.1                                                  | 2.7                                                  | 5                |
| MAF-23                   | 622 (Langmuir)                        | 3.3                                                  | 2.5                                                  | 6                |
| NH <sub>2</sub> -MIL-125 | 1469                                  | 4.0                                                  | 2.2                                                  | 7                |
| USTC-253                 | 1800                                  | 3.7                                                  | 2.1                                                  | 8                |
| SNU-M10                  | 505 (Langmuir)                        | 3.3                                                  | 2.1                                                  | 9                |
| 1                        | 385                                   | 2.8                                                  | 1.6                                                  | 10               |
| Py-UiO-66                | 537                                   | N.A.                                                 | 1.4                                                  | 11               |
| TMOF-1                   | 256                                   | 2.2                                                  | 1.4                                                  | 12               |
| SNU-5                    | 2189 (Langmuir)                       | 0.9                                                  | N.A.                                                 | 13               |

**Table S4.** Comparisons about cycloaddition reaction of CO<sub>2</sub> with PO of some selected MOFs.

| Entry | Catalysts                                                          | Tem. /°C | P /MPa | Time /h | Yield /% | Ref.             |
|-------|--------------------------------------------------------------------|----------|--------|---------|----------|------------------|
| 1     | MIL-101-N( <i>n</i> -Bu) <sub>3</sub> Br <sup>[a]</sup>            | 80       | 2      | 8       | 99.1     | 14               |
| 2     | Zn <sub>3</sub> (L) <sub>3</sub> (H <sub>2</sub> L) <sup>[b]</sup> | 80       | 1      | 5       | 99       | 15               |
|       | Zn <sub>3</sub> (L) <sub>3</sub> (H <sub>2</sub> L) <sup>[c]</sup> | 30       |        | 24      | 99       |                  |
| 3     | Gd-MOF <sup>[d]</sup>                                              | 80       | 2      | 5       | 98.4     | 16               |
| 4     | MOF-5 <sup>[e]</sup>                                               | 50       | 6      | 4       | 97.6     | 17               |
| 5     | <b>Compound 1</b>                                                  | 60       | 2      | 6       | 97       | <b>This work</b> |
| 6     | RD Au/Zn-MOF nanocages <sup>[f]</sup>                              | 70       | 3      | 6       | 96       | 18               |
|       | NOTT-100                                                           |          |        |         | 66       |                  |
|       | NOTT-100-Py1                                                       |          |        |         | 81       |                  |
|       | NOTT-100-Py2                                                       |          |        |         | 96       |                  |
| 7     | NOTT-100-Py3                                                       | 55       | 0.2    | 48      | 91       | 19               |
|       | NOTT-100-H3 <sup>[g]</sup>                                         |          |        |         | 90       |                  |
|       | <i>int</i> -MOF-5 <sup>[h]</sup>                                   |          |        |         | 94       |                  |
| 8     | <i>int</i> -MOF-5 <sup>[h]</sup>                                   | 50       | 5.5    | 0.5     | 94       | 20               |
| 9     | MIL-101-NHIM-NH <sub>2</sub> <sup>[i]</sup>                        | 120      | 2      | 4       | 93.5     | 21               |
| 10    | JLU-Liu22 <sup>[j]</sup>                                           | 60       | 2      | 6       | 92       | 22               |
| 11    | Zn(L)(aip)(H <sub>2</sub> O) <sup>[k]</sup>                        | 100      | 3      | 6       | 92       | 23               |
| 12    | <b>gea</b> -MOF-1 <sup>[l]</sup>                                   | 120      | 2      | 6       | 88       | 24               |
| 13    | Ni(salphen)-MOF <sup>[m]</sup>                                     | 80       | 2      | 4       | 80       | 25               |

Reaction conditions: <sup>a</sup> PO (30 mmol), catalyst (0.27 mmol). <sup>b</sup> PO (34.5 mmol), catalyst (0.1 g, Zn<sub>3</sub>(L)<sub>3</sub>(H<sub>2</sub>L) mol % = 0.27, Zn mol % = 0.05, Bu<sub>4</sub>NBr mol % = 3.6). <sup>c</sup> PO (34.5 mmol), catalyst (0.1 g), TBAB (0.4 g). <sup>d</sup> PO (20 mmol), catalyst (100 mg), TBAB (2.5 mol %). <sup>e</sup> PO (20 mmol), catalyst (100 mg), TBAB (2.5 mol %). <sup>f</sup> PO (10 mmol), catalyst (32 mg). <sup>g</sup> PO (10 mmol), catalyst (0.5 mol %, calculated based on Cu content), TBAB (2 mmol, 10 mol %). <sup>h</sup> PO (25 mmol), catalyst (0.0325 mmol), TBAB (0.242 mmol). <sup>i</sup> PO (34.5 mmol), catalyst (0.2 g). <sup>j</sup> PO (40 mmol), catalyst (0.25 mol % open Cu sites), TBAB (2 mmol). <sup>k</sup> PO (3.5 mL), catalyst (0.07 mmol). <sup>l</sup> PO (100 mmol), catalyst (60 mg, 0.15 mmol Y<sup>3+</sup>), TBAB (0.15 mmol). <sup>m</sup> PO (10 mmol), catalyst (0.05 g), TBAB (3 mol %).

**Table S5.** Crystal data comparisons of compound **1** and UTSA-20.

|                                                    | Compound 1  | UTSA-20                   |
|----------------------------------------------------|-------------|---------------------------|
| Crystal system                                     | Monoclinic  | Hexagonal                 |
| Space group                                        | <i>C2/c</i> | <i>P6<sub>3</sub>/mcm</i> |
| <i>a</i> (Å)                                       | 33.183      | 22.287                    |
| <i>b</i> (Å)                                       | 19.468      | 22.287                    |
| <i>c</i> (Å)                                       | 16.287      | 12.816                    |
| $\alpha$ (°)                                       | 90          | 90                        |
| $\beta$ (°)                                        | 102.34      | 90                        |
| $\gamma$ (°)                                       | 90          | 120                       |
| <i>V</i> (Å <sup>3</sup> )                         | 10279       | 5513                      |
| BET surface area (m <sup>2</sup> g <sup>-1</sup> ) | 1355        | 1156                      |
| Pore volume (cm <sup>3</sup> g <sup>-1</sup> )     | 0.65        | 0.63                      |

**Table S6.** Comparisons about cycloaddition reaction of CO<sub>2</sub> with 20 mmol PO catalyzed by compound **1** and UTSA-20.

| Entry | Compounds                                         | TBAB    | Tem. /°C | P /MPa | Time /h | Yield /% |
|-------|---------------------------------------------------|---------|----------|--------|---------|----------|
| 1     | Compound 1<br>(0.5 mol % LASs and 0.5 mol % BASs) | 5 mol % | 60       | 2      | 6       | 97       |
| 2     | UTSA-20<br>(0.5 mol % LASs)                       | 5 mol % | 60       | 2      | 6       | 65       |
| 3     | UTSA-20<br>(1 mol % LASs)                         | 5 mol % | 60       | 2      | 6       | 74       |

**Table S7.** ICP-OES analysis of Cu<sup>2+</sup> after the 5<sup>th</sup> time reaction.

| Catalyst   | Cu <sup>2+</sup> concentration (ppm) |
|------------|--------------------------------------|
| Compound 1 | 0.0187                               |

**Table S8.** Sizes of epoxides selected for the experiments.<sup>22</sup>

| Epoxides                   | Volume                 |
|----------------------------|------------------------|
| Propylene oxide            | 6.1 Å × 4.4 Å × 5.0 Å  |
| Styrene oxide              | 9.3 Å × 6.9 Å × 4.6 Å  |
| 1,2-epoxy-3-phenoxypropane | 12.5 Å × 7.1 Å × 5.4 Å |
| Cyclohexene oxide          | 6.5 Å × 7.0 Å × 5.0 Å  |

## References

- 1 Z. Guo, H. Wu, G. Srinivas, Y. Zhou, S. Xiang, Z. Chen, Y. Yang, W. Zhou, M. O'Keeffe, B. Chen, A metal–organic framework with optimized open metal sites and pore spaces for high methane storage at room temperature, *Angew. Chem. Int. Ed.*, 2011, **50**, 3178-3181.
- 2 T. M. McDonald, W. R. Lee, J. A. Mason, B. M. Wiers, C. S. Hong, J. R. Long, Capture of carbon dioxide from air and flue gas in the alkylamine-appended metal-organic framework mmen-Mg<sub>2</sub>(dobpdc), *J. Am. Chem. Soc.*, 2012, **134**, 7056-7065.
- 3 R.-B. Lin, D. Chen, Y.-Y. Lin, J.-P. Zhang, X.-M. Chen, A zeolite-like zinc triazolate framework with high gas adsorption and separation performance, *Inorg. Chem.*, 2012, **51**, 9950-9955.
- 4 A. R. Millward, O. M. Yaghi, Metal-organic frameworks with exceptionally high capacity for storage of carbon dioxide at room temperature, *J. Am. Chem. Soc.*, 2005, **127**, 17998-17999.
- 5 J.-S. Qin, D.-Y. Du, W.-L. Li, J.-P. Zhang, S.-L. Li, Z.-M. Su, X.-L. Wang, Q. Xu, K.-Z. Shao, Y.-Q. Lan, N-rich zeolite-like metal–organic framework with sodalite topology: high CO<sub>2</sub> uptake, selective gas adsorption and efficient drug delivery, *Chem. Sci.*, 2012, **3**, 2114-2118.
- 6 P.-Q. Liao, D.-D. Zhou, A.-X. Zhu, L. Jiang, R.-B. Lin, J.-P. Zhang, X.-M. Chen, Strong and dynamic CO<sub>2</sub> sorption in a flexible porous framework possessing guest chelating claws, *J. Am. Chem. Soc.*, 2012, **134**, 17380-17383.
- 7 S.-N. Kim, J. Kim, H.-Y. Kim, H.-Y. Cho, W.-S. Ahn, Adsorption/catalytic properties of MIL-125 and NH<sub>2</sub>-MIL-125, *Catal. Today*, 2013, **204**, 85-93.
- 8 Z.-R. Jiang, H. Wang, Y. Hu, J. Lu, H.-L. Jiang, Polar group and defect engineering in a metal-organic framework: synergistic promotion of carbon dioxide sorption and conversion, *ChemSusChem*, 2015, **8**, 878-885.
- 9 H.-S. Choi, M. P. Suh, Highly selective CO<sub>2</sub> capture in flexible 3D coordination polymer networks, *Angew. Chem. Int. Ed.*, 2009, **48**, 6865-6869.
- 10 G. Chakraborty, P. Das, S. K. Mandal, Efficient and highly selective CO<sub>2</sub> capture, separation, and chemical conversion under ambient conditions by a polar-group-appended copper(II) metal–organic framework, *Inorg. Chem.*, 2021, **60**, 5071-5080.
- 11 Y.-L. Liu, Y. Di, F. Chen, C. Zhou, B. Liu, A pyridyl-decorated Zr-organic framework for enhanced gas separation and CO<sub>2</sub> transformation, *Dalton Trans.*, 2021, **50**, 3848-3853.
- 12 G. Zhang, G. Wei, Z. Liu, S. R. J. Oliver, H. Fei, A robust sulfonate-based metal-organic framework with permanent porosity for efficient CO<sub>2</sub> capture and conversion, *Chem. Mater.*, 2016, **28**, 6276-6281.
- 13 Y.-G. Lee, H. R. Moon, Y. E. Cheon, M. P. Suh, A comparison of the H<sub>2</sub> sorption capacities of isostructural metal-organic frameworks with and without accessible metal sites: [{Zn<sub>2</sub>(abtc)(dmf)<sub>2</sub>}]<sub>3</sub> and [{Cu<sub>2</sub>(abtc)(dmf)<sub>2</sub>}]<sub>3</sub> versus [{Cu<sub>2</sub>(abtc)}]<sub>3</sub>, *Angew. Chem. Int. Ed.*, 2008, **47**, 7741-7745.
- 14 D. Ma, B. Li, K. Liu, X. Zhang, W. Zou, Y. Yang, G. Li, Z. Shi, S. Feng, Bifunctional MOF heterogeneous catalysts based on the synergy of dual functional sites for efficient conversion of CO<sub>2</sub> under mild and co-catalyst free conditions, *J. Mater. Chem. A*, 2015, **3**, 23136–23142.
- 15 Z. Gao, X. Zhang, P. Xu, J. Sun, Dual hydrogen-bond donor group-containing Zn-MOF for the highly effective coupling of CO<sub>2</sub> and epoxides under mild and solvent-free conditions, *Inorg. Chem. Front.*, 2020, **7**, 1995-2005.



- 16 Z. Xue, J. Jiang, M.-G. Ma, M.-F. Li, T. Mu, Gadolinium-based metal–organic framework as an efficient and heterogeneous catalyst to activate epoxides for cycloaddition of CO<sub>2</sub> and alcoholysis, *ACS Sustainable Chem. Eng.*, 2017, **5**, 2623-2631.
- 17 J. Song, Z. Zhang, S. Hu, T. Wu, T. Jiang, B. Han, MOF-5/*n*-Bu<sub>4</sub>NBr: an efficient catalyst system for the synthesis of cyclic carbonates from epoxides and CO<sub>2</sub> under mild conditions, *Green Chem.*, 2009, **11**, 1031–1036.
- 18 L. Tang, S. Zhang, Q. Wu, X. Wang, H. Wu, Z. Jiang, Heterobimetallic metal–organic framework nanocages as highly efficient catalysts for CO<sub>2</sub> conversion under mild conditions, *J. Mater. Chem. A*, 2018, **6**, 2964–2973.
- 19 Z. Fan, J. Wang, W. Wang, S. Burger, Z. Wang, Y. Wang, C. Wöll, M. Cokoja, R. A. Fischer, Defect engineering of copper paddlewheel-based metal-organic frameworks of type NOTT-100: implementing truncated linkers and its effect on catalytic properties, *ACS Appl. Mater. Interfaces*, 2020, **12**, 37993-38002.
- 20 H. Kim, H. Moon, M. Sohail, Y. Yoon, S. F. A. Shah, K. Yim, J. Moon, Y. C. Park, Synthesis of cyclic carbonate by CO<sub>2</sub> fixation to epoxides using interpenetrated MOF-5/*n*-Bu<sub>4</sub>NBr, *J Mater Sci*, 2019, **54**, 11796-11803.
- 21 C. Bao, Y. Jiang, L. Zhao, D. Li, P. Xu, J. Sun, Aminoethylimidazole ionic liquid-grafted MIL-101-NH<sub>2</sub> heterogeneous catalyst for the conversion of CO<sub>2</sub> and epoxide without solvent and cocatalyst, *New J. Chem.*, 2021, **45**, 13893-13901.
- 22 J. Gu, X. Sun, X. Liu, Y. Yuan, H. Shan, Y. Liu, Highly efficient synergistic CO<sub>2</sub> conversion with epoxide using copper polyhedron-based MOFs with Lewis acid and base sites, *Inorg. Chem. Front.*, 2020, **7**, 4517-4526.
- 23 L. Song, C. Chen, X. Chen, N. Zhang, Isomorphic MOFs functionalized by free-standing acylamide and organic groups serving as self-supported catalysts for the CO<sub>2</sub> cycloaddition reaction, *New J. Chem.*, 2016, **40**, 2904-2909.
- 24 V. Guillerm, Ł. J. Weseliński, Y. Belmabkhout, A. J. Cairns, V. D’Elia, Ł. Wojtas, K. Adil, M. Eddaoudi, Discovery and introduction of a (3,18)-connected net as an ideal blueprint for the design of metal–organic frameworks, *Nat. Chem.*, 2014, **6**, 673–680.
- 25 Y. Ren, Y. Shi, J. Chen, S. Yang, C. Qi, H. Jiang, Ni(salphen)-based metal–organic framework for the synthesis of cyclic carbonates by cycloaddition of CO<sub>2</sub> to epoxides, *RSC Adv.*, 2013, **3**, 2167–2170.
